# Supplementary material for: PRMT1-mediated EZH2 methylation promotes breast cancer cell proliferation and tumorigenesis
Source: PubMed Central journal article supplement (PMC8590688; doi:10.1038/s41419-021-04381-5), 2021-11-13
Supplement: 41419_2021_4381_MOESM7_ESM.pdf [file 41419_2021_4381_MOESM7_ESM.pdf]

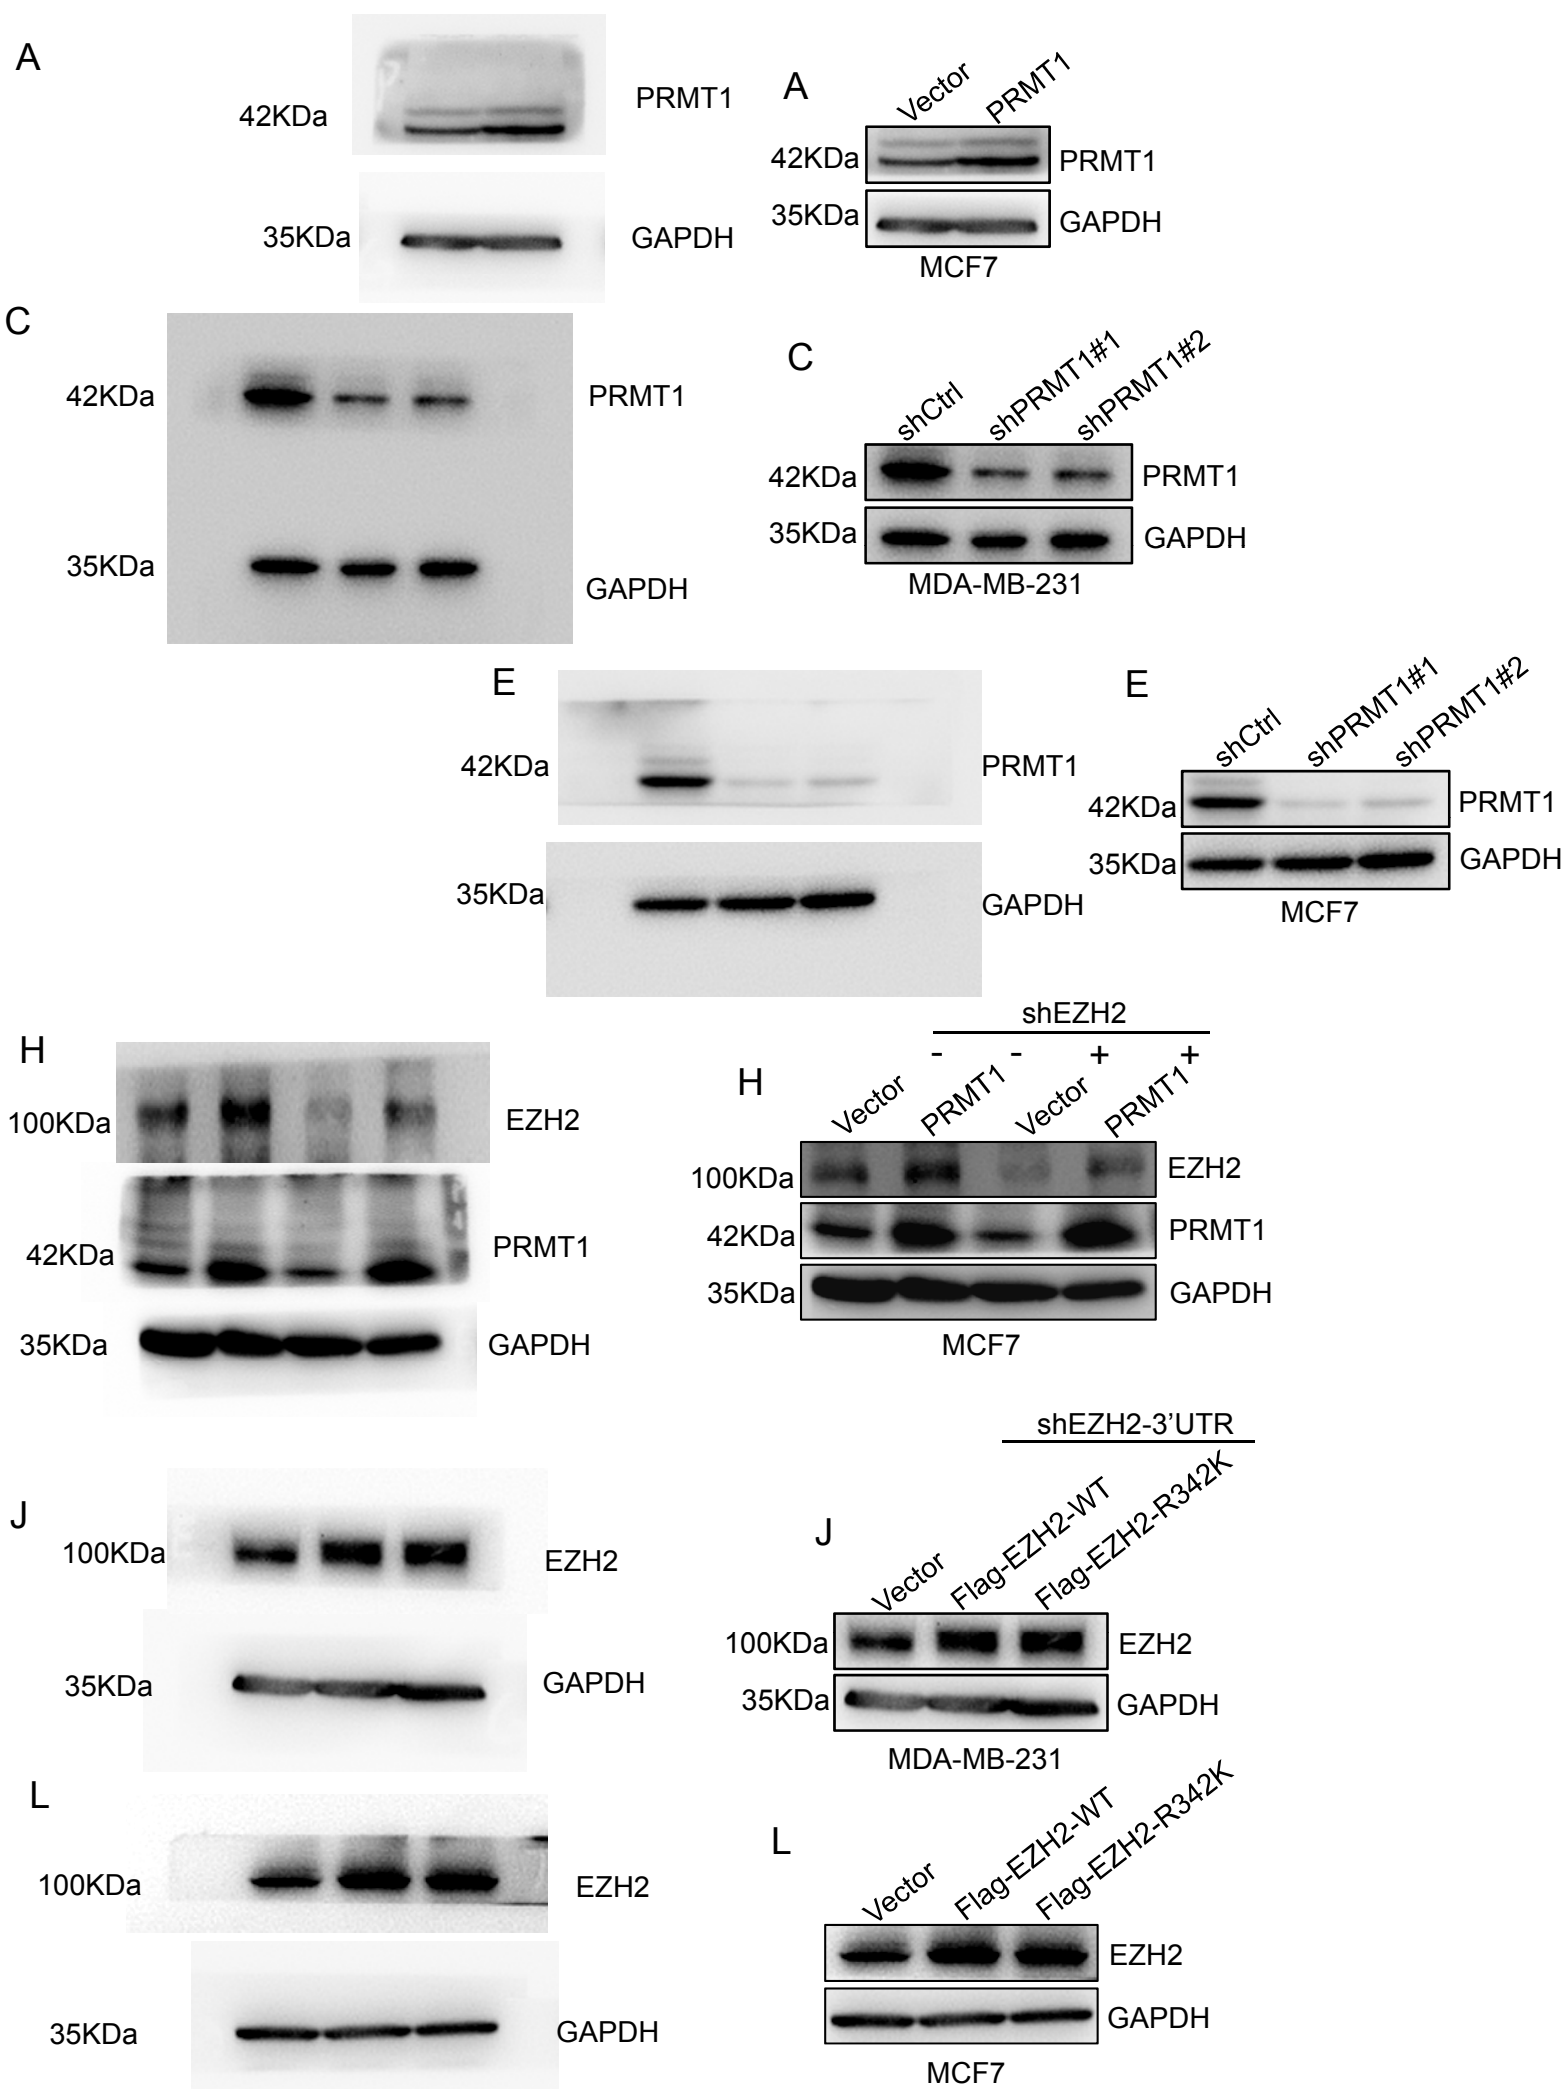

**Figure 1**

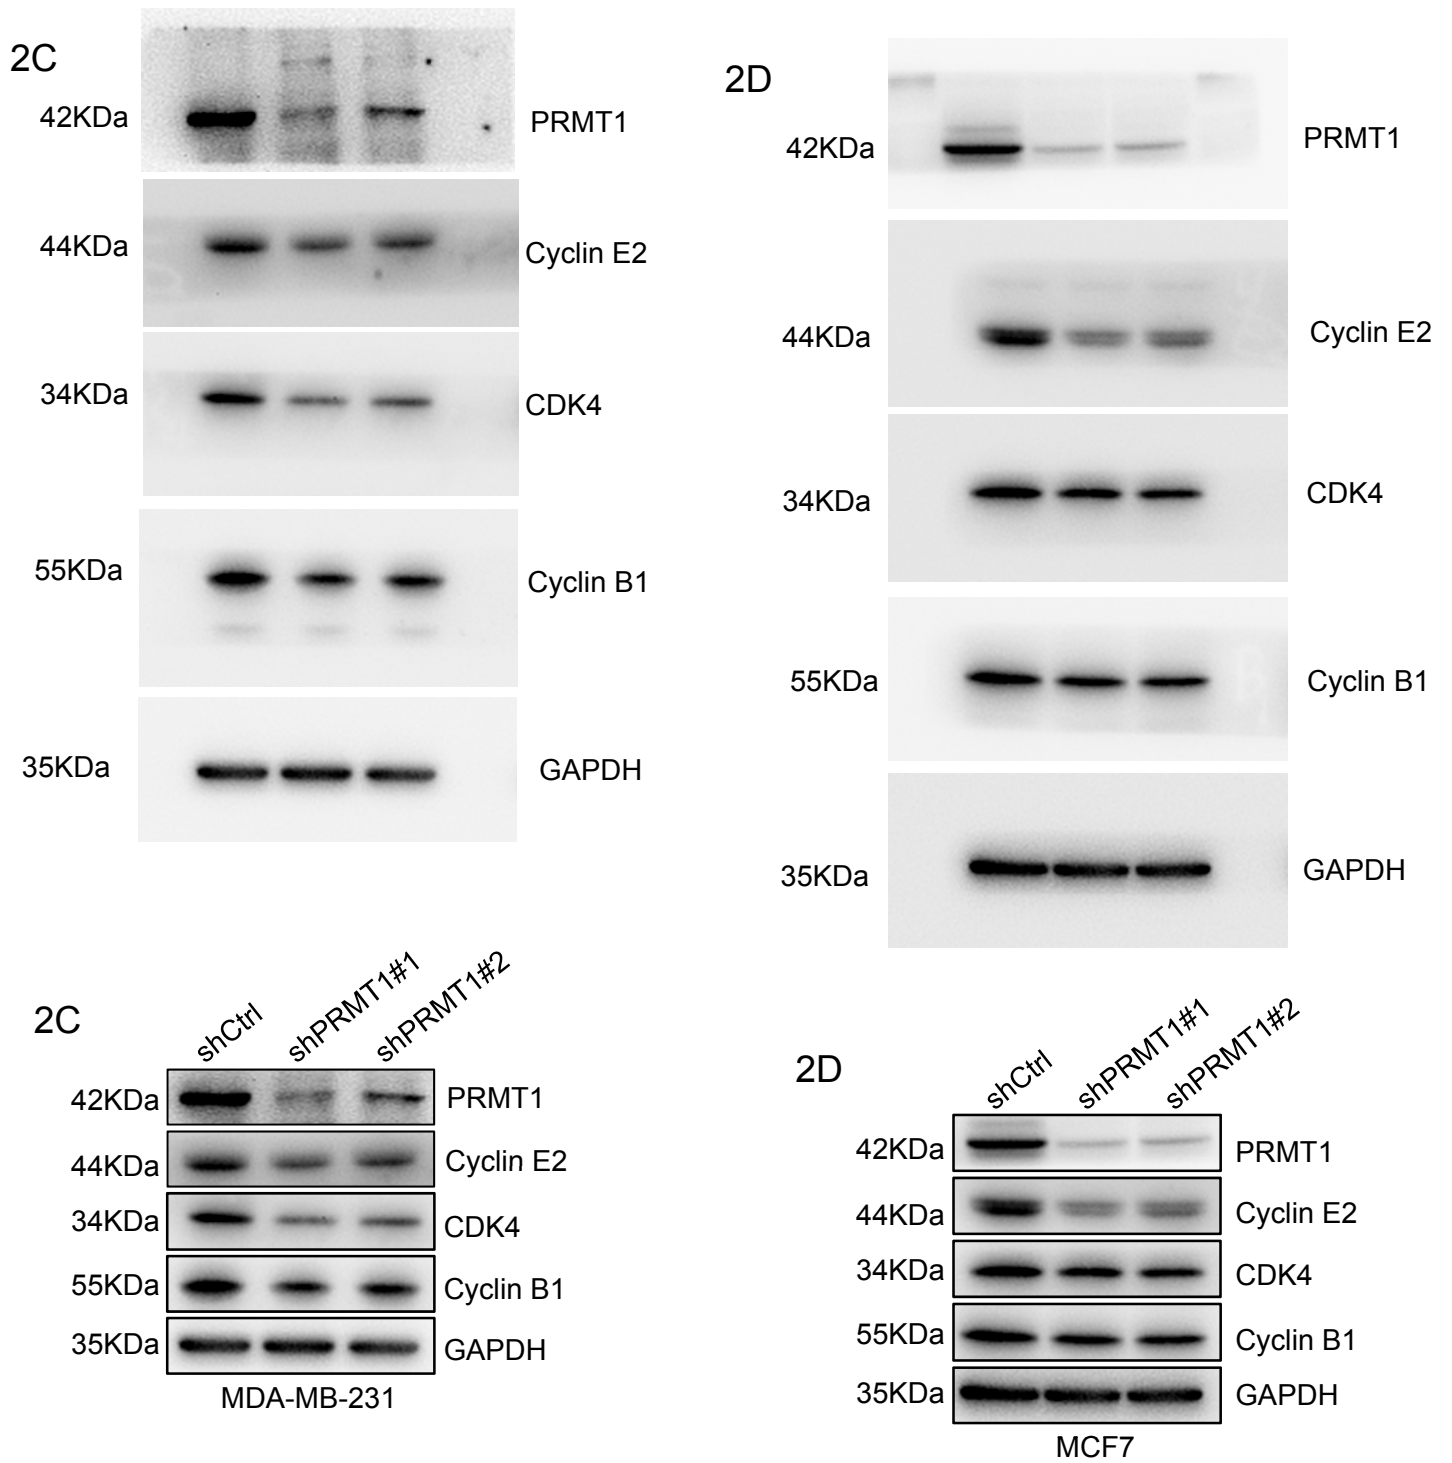

**Figure 2**

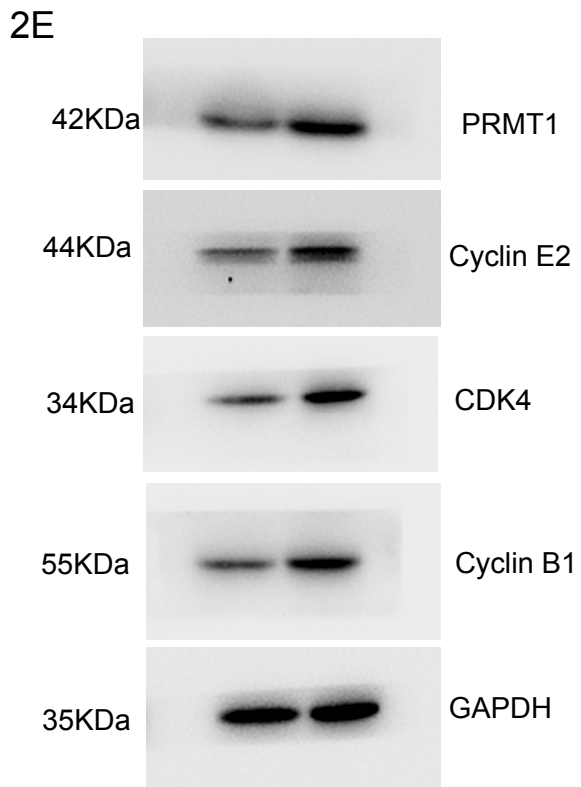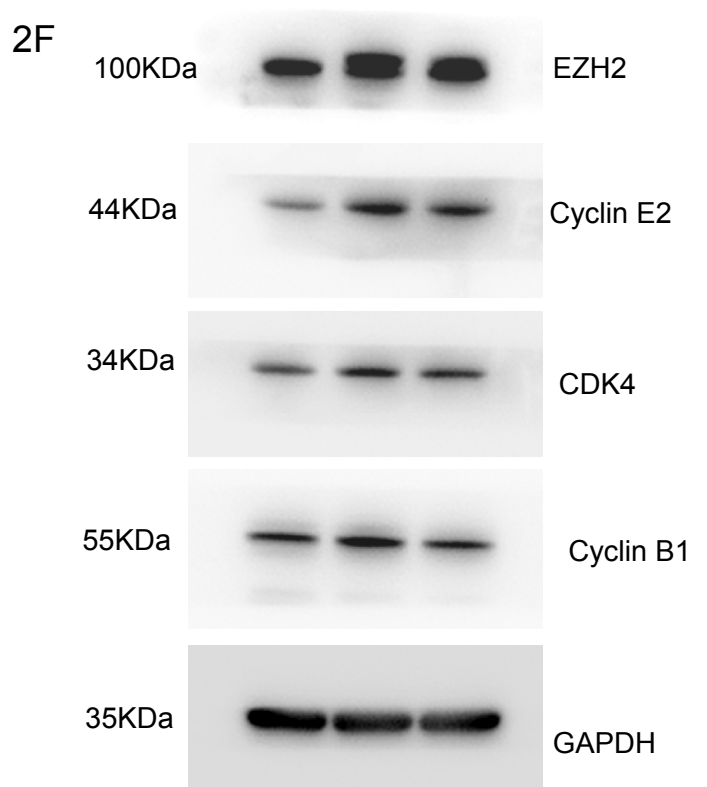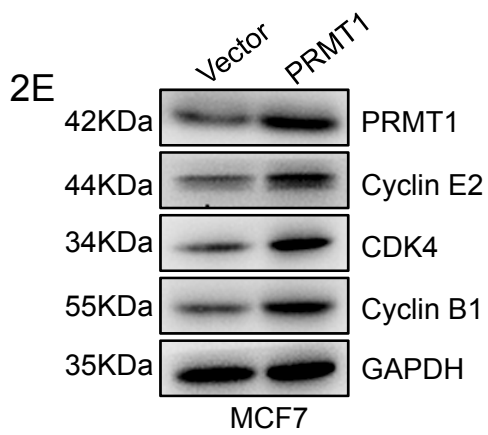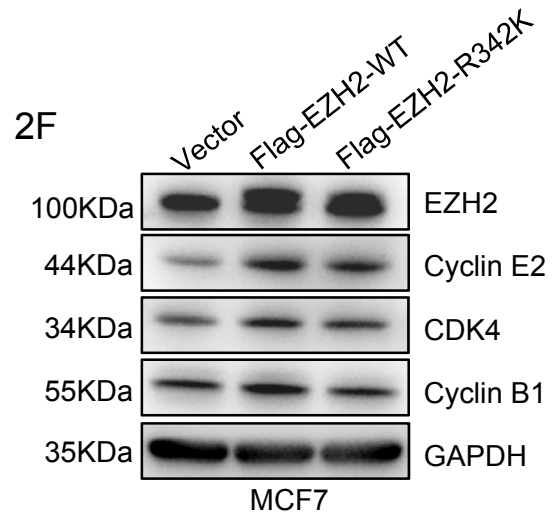

**Figure 2---continue**

3A

Input

IP Flag

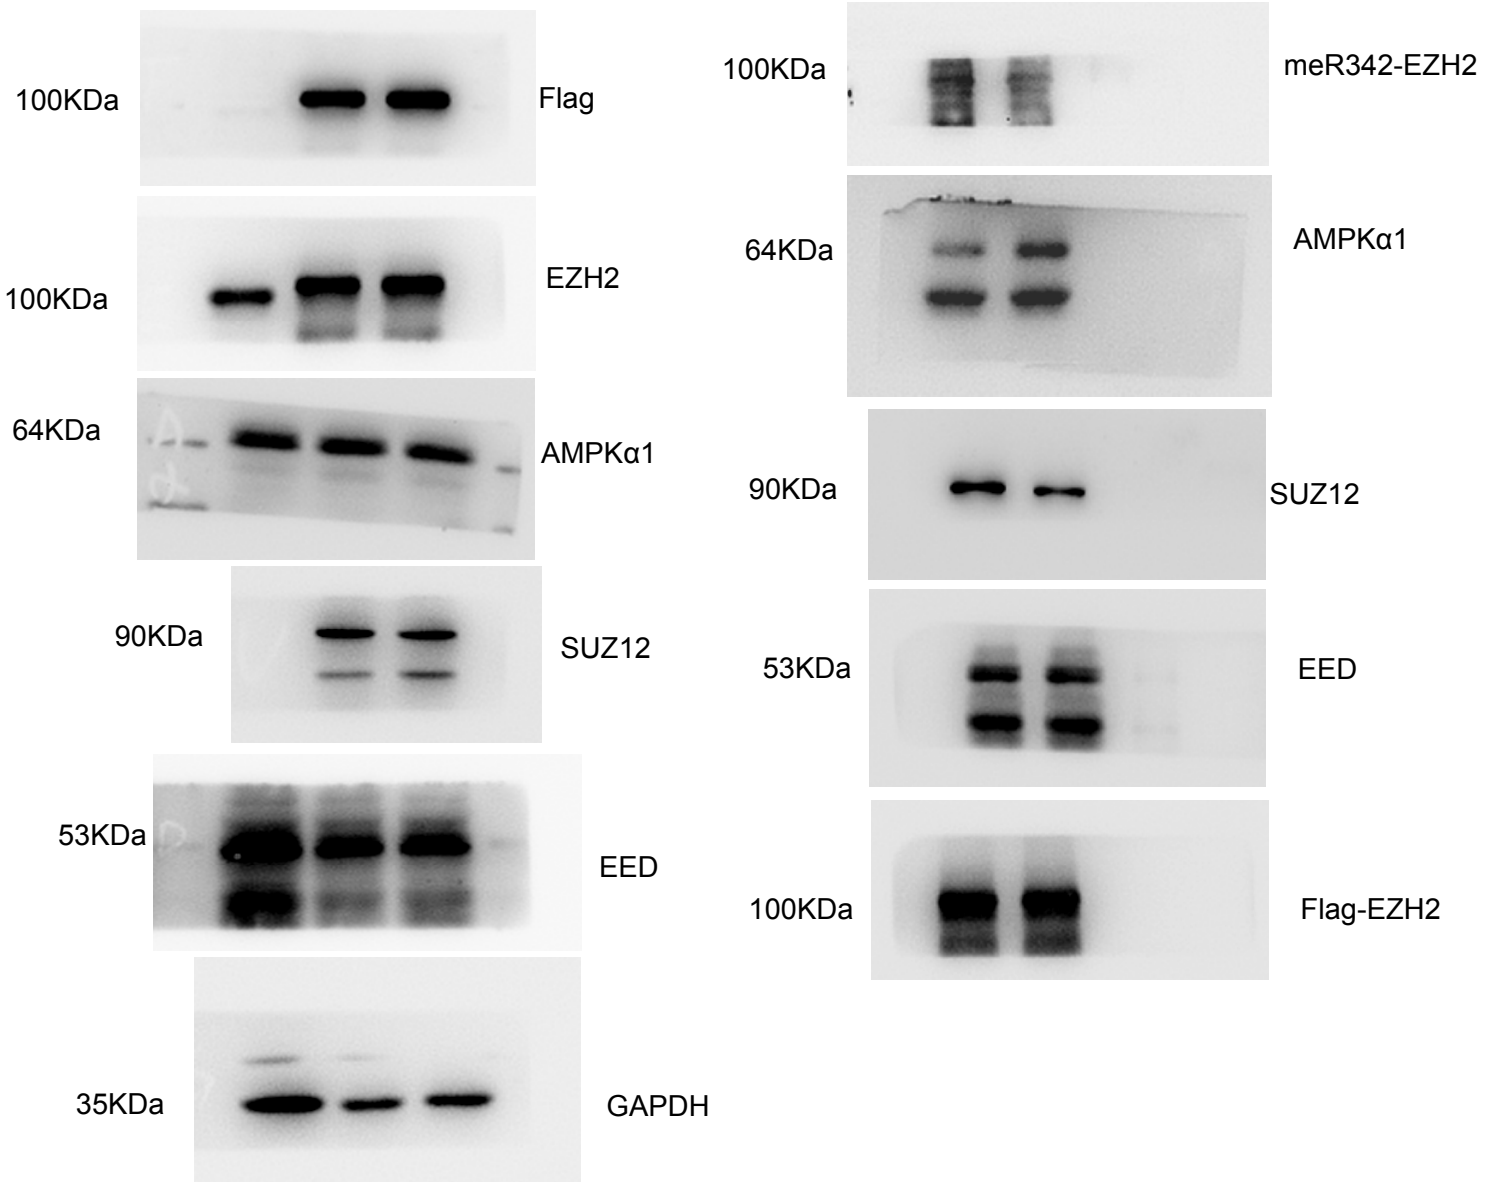

shEZH2-3'UTR

shEZH2-3'UTR

3A

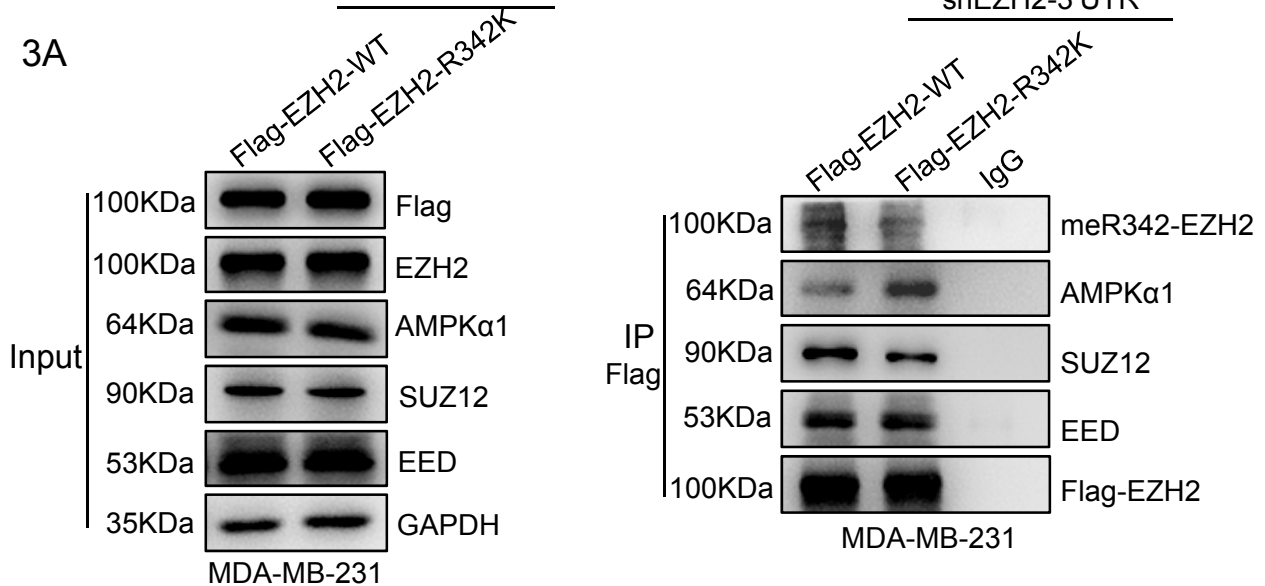

Figure 3

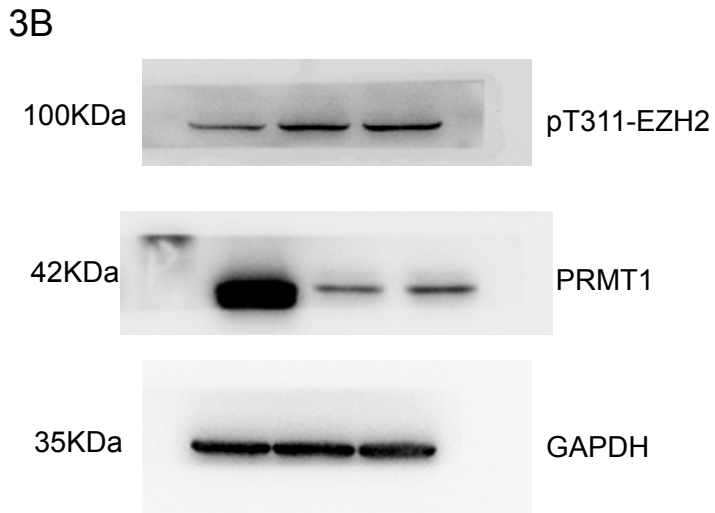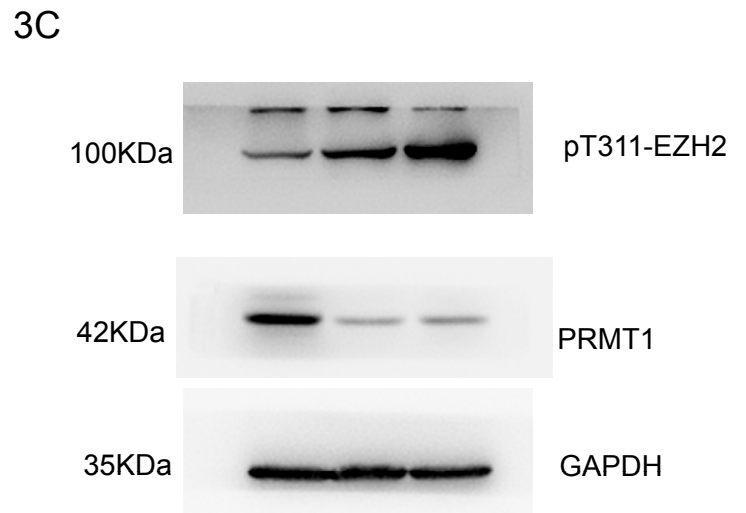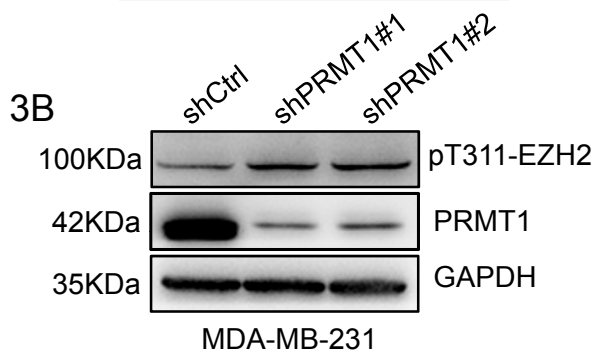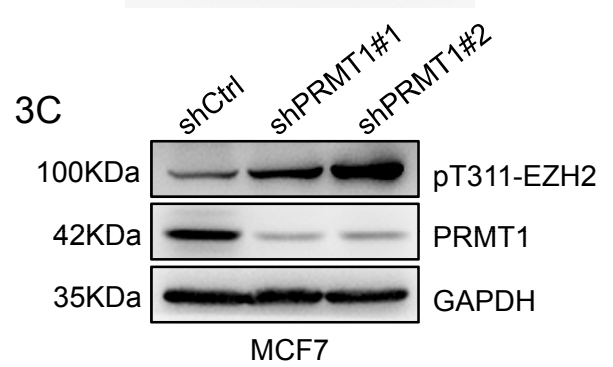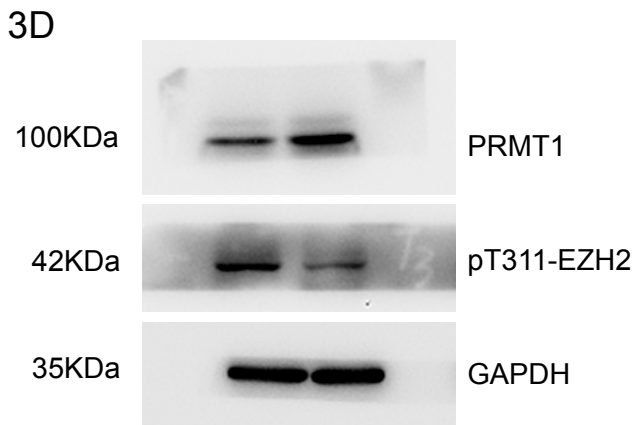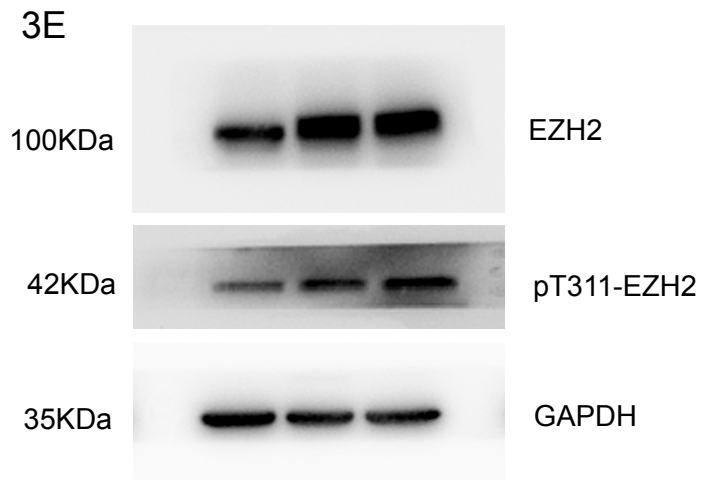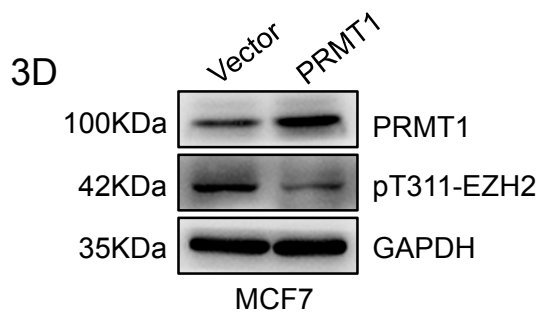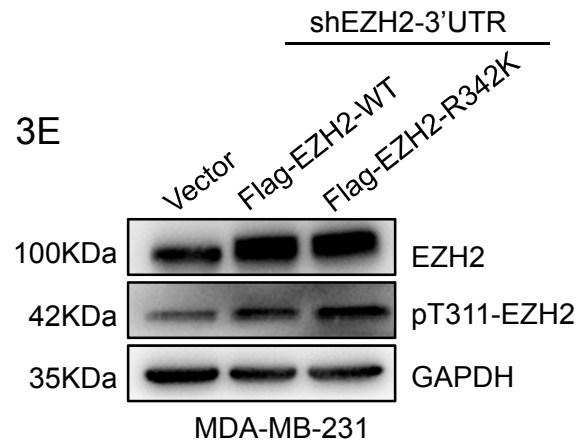

**Figure 3---continue**

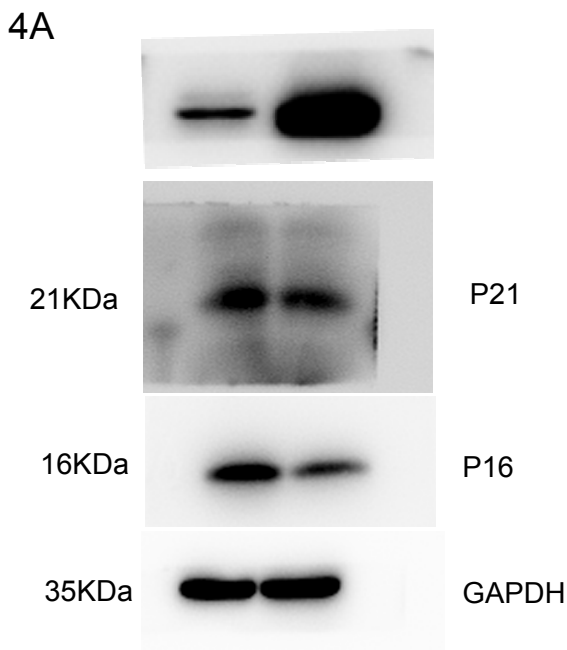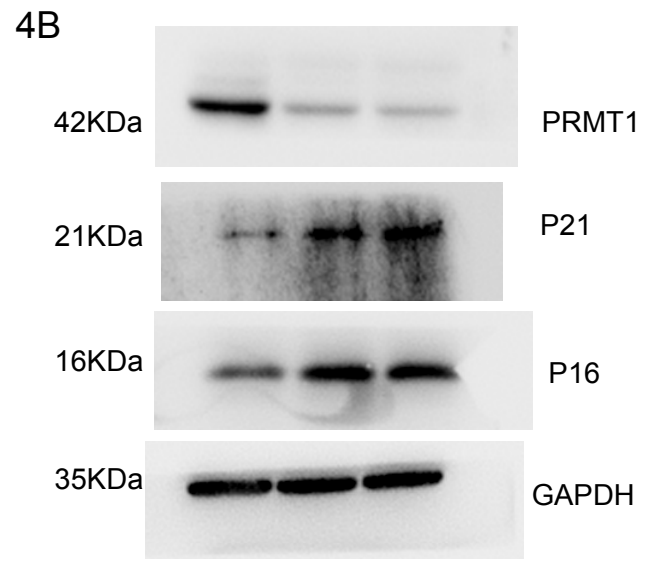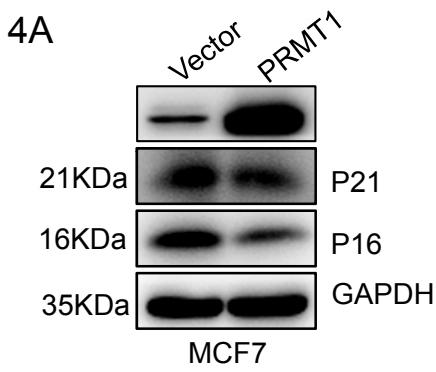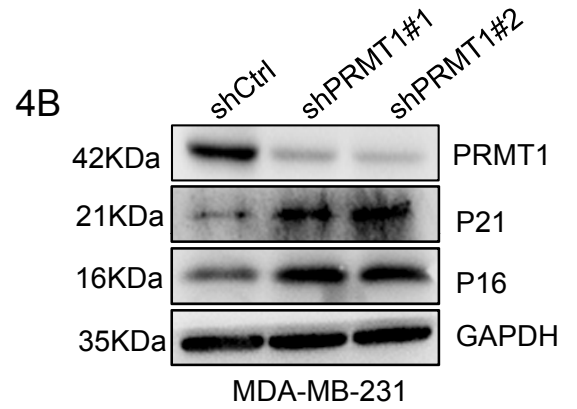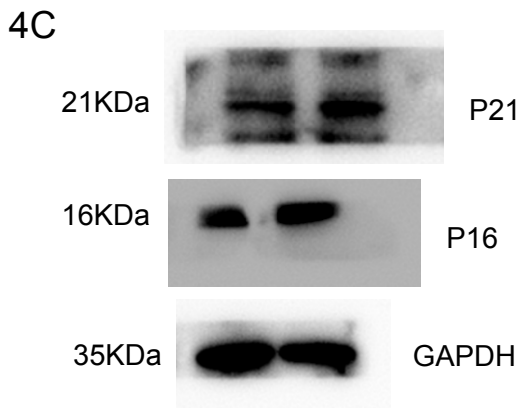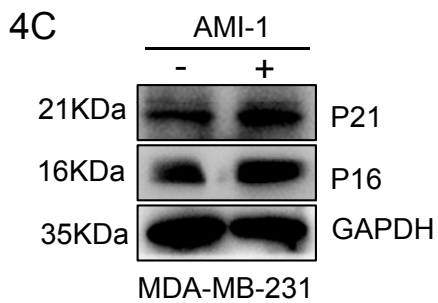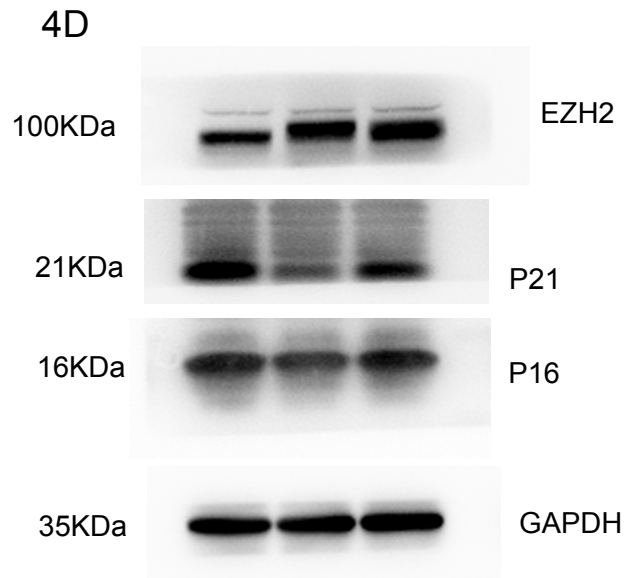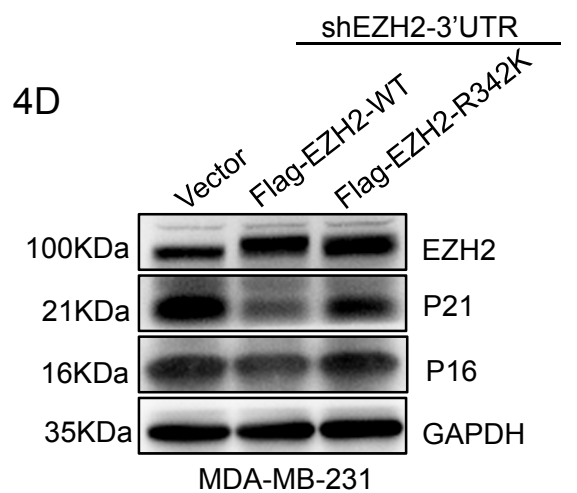

**Figure 4**

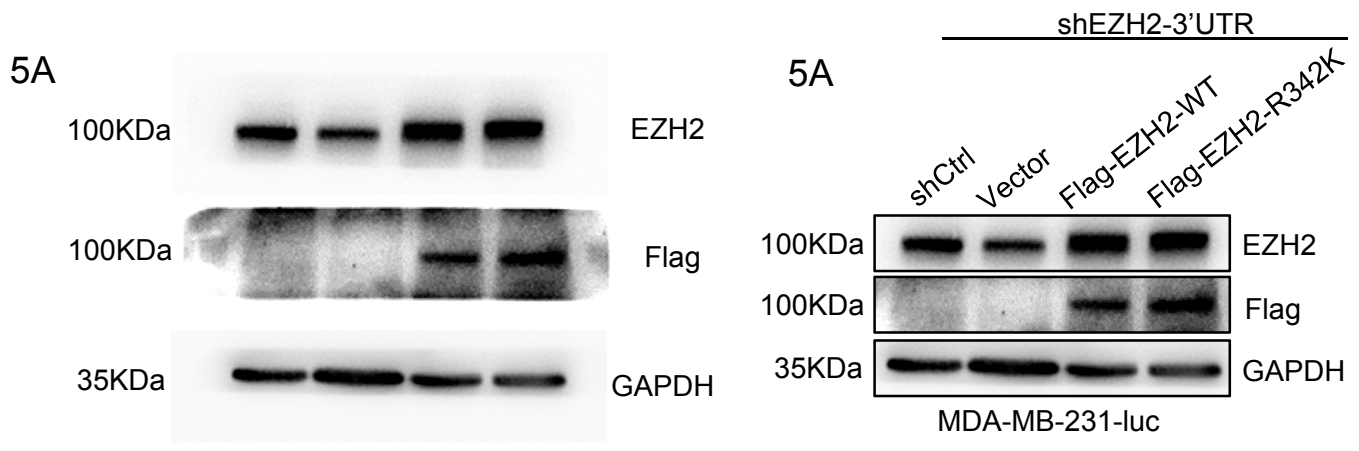

**Figure 5**

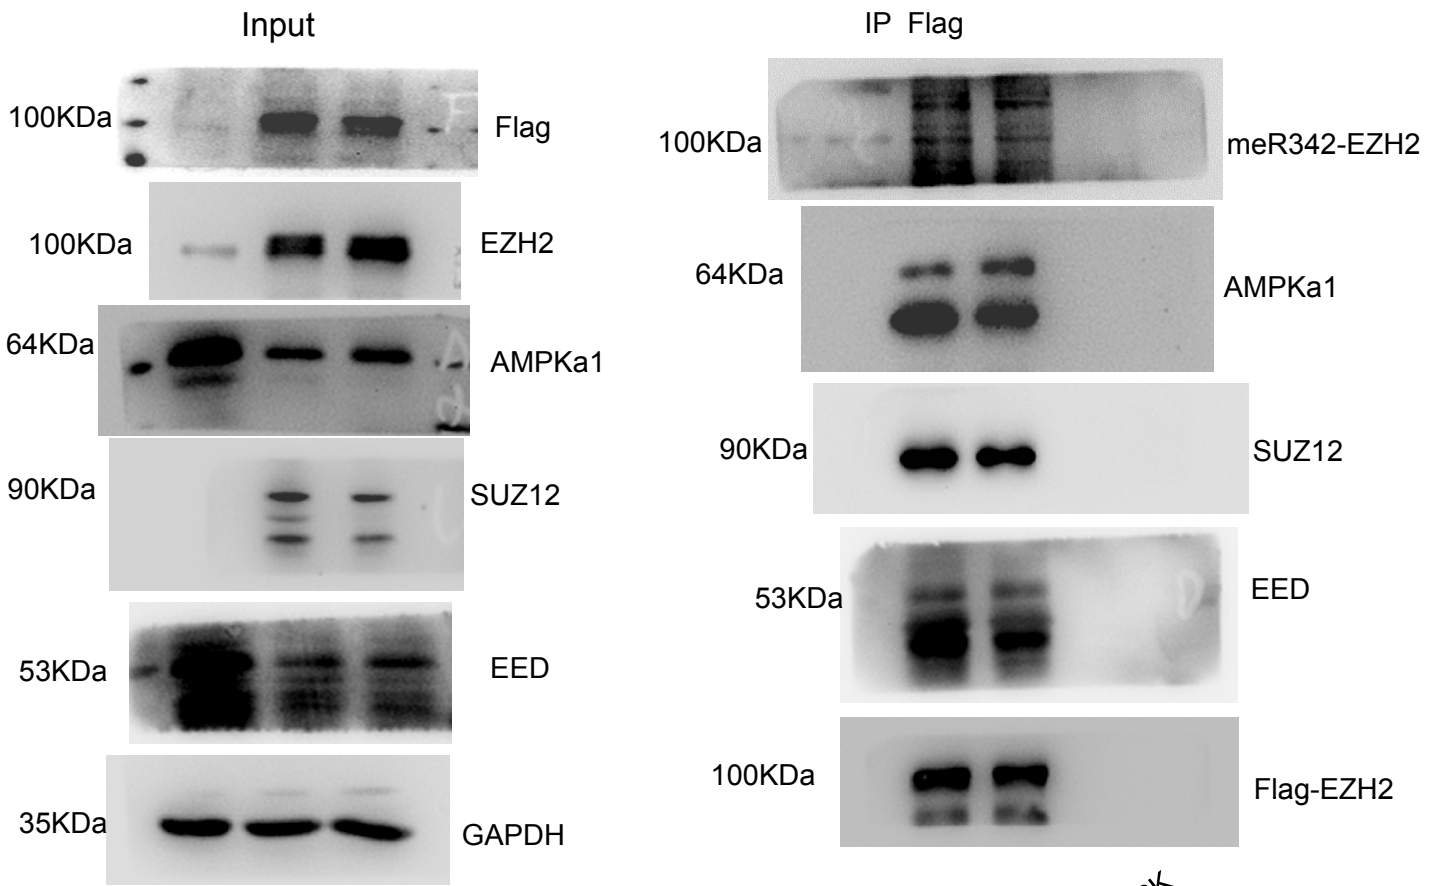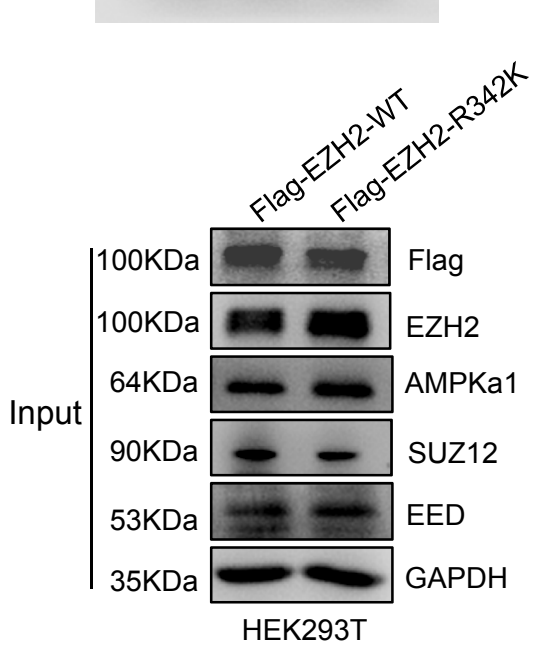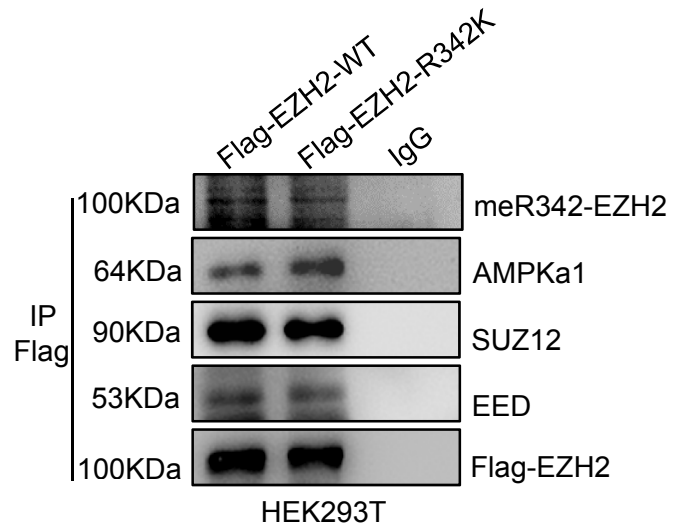

**Supplementary Figure 2**

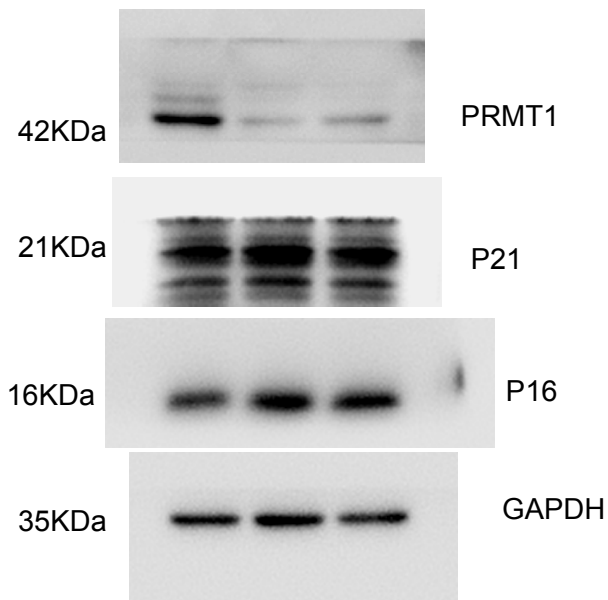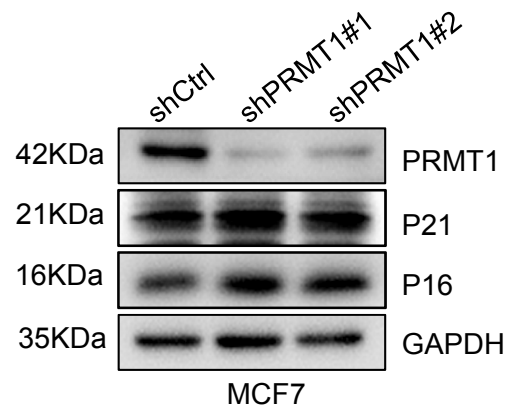

**Supplementary Figure 3**
